# Supplementary material for: Gene Expression Profiling as a Potential Tool for Precision Oncology in Non-Small Cell Lung Cancer
Source: MDPI journal article supplement (doi:10.3390/cancers13194734), 2021-09-22
Supplement: s1 [file s1]

# Supplementary Materials: Gene Expression Profiling as a Potential Tool for Precision Oncology in Non-Small Cell Lung Cancer

Sara Hijazo-Pechero, Ania Alay, Raúl Marín, Noelia Vilariño, Cristina Muñoz-Pinedo, Alberto Villanueva, David Santamaría, Ernest Nadal, Xavier Solé

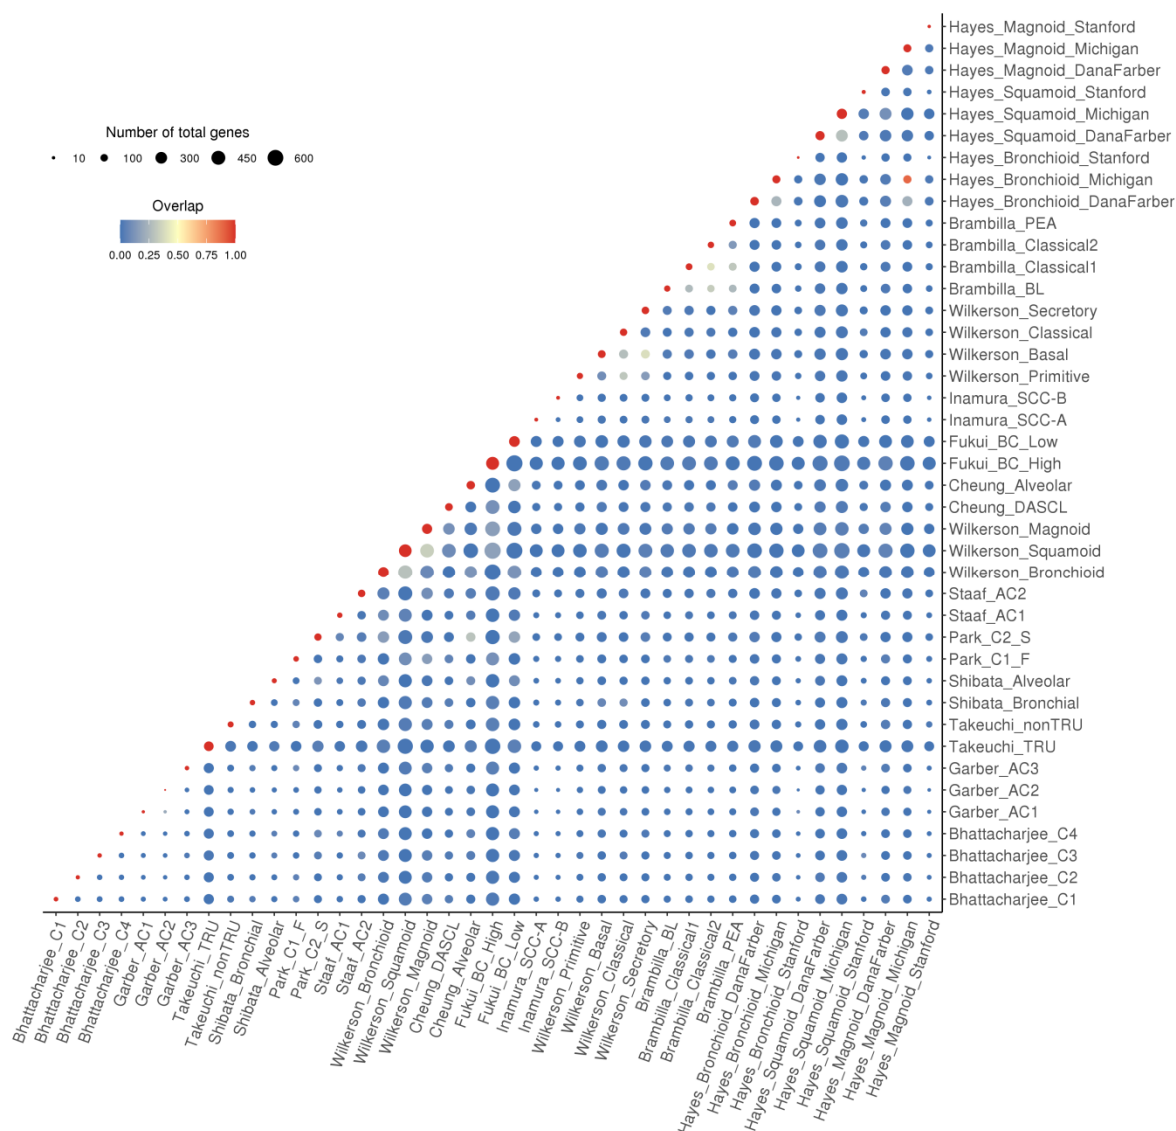

**Figure S1.** NSCLC transcriptional subtypes signatures overlap. This plot represents the degree of overlap between each pair of transcriptional subtypes signatures as the number of genes in common divided by the total number of genes in both signatures. Thus, gene overlap values range between 0 (blue) and 1 (red), being 1 the highest grade of overlap (all genes in common between the two signatures). Therefore, to compute the overlap we performed two previous steps detailed hereafter to construct a comparable set of signatures. 1) Gene signature extraction: subtype specific signatures were extracted directly as gene lists when available. For the studies that provide a centroid-classifier (i.e., unique list of genes with different weights depending on the subtype), we assigned to each subtype the genes that with positive weights for that specific subtype. In the case of those studies that after the gene expression-based classification through clustering analysis performed a differential gene expression approach between the identified groups, we assigned to each subtype the genes that were overexpressed in that subtype according to the fold change provided. Finally, we excluded those studies that did not provide any further gene lists after performing the gene expression-based classifica-

tion. 2) Gene name homogenization: the next step set out to adapt all signatures to a common identifier as they were defined by gene symbols, probe identifiers or unigene identifiers. Some signatures became shorter as some of the identifiers were deprecated and/or no associated gene symbol was found for them. The reason for this is that some of these studies are very old and used very old microarray platforms to do the transcriptional profiling. The results show that in general there is little overlap between gene expression signatures from different studies.

**Table S1.** Intrinsic lung adenocarcinoma transcriptional subtypes and their association with genomic alterations, molecular features and clinical covariates.

| Signature                                     | Subtype    | DNA Alterations | Molecular Features                                                                                                                                                                     | Clinical Covariates                                                                                                   |
|-----------------------------------------------|------------|-----------------|----------------------------------------------------------------------------------------------------------------------------------------------------------------------------------------|-----------------------------------------------------------------------------------------------------------------------|
| Bhattacharjee et al.<br>2001 [1]<br>100 genes | C1         | -               | - Proliferation<br>- Cell division                                                                                                                                                     | - Poor differentiation                                                                                                |
|                                               | C2         | -               | - Proliferation<br>- Neuroendocrine markers<br>- Ornithine decarboxylase 1<br>- Surfactant proteins                                                                                    | - Worse survival outcome                                                                                              |
|                                               | C3         | -               | - Ornithine decarboxylase 1<br>Surfactant proteins<br>- Type II pneumocyte expression                                                                                                  | - Well differentiated                                                                                                 |
|                                               | C4         | -               | - Type II pneumocyte expression<br>Surfactant proteins                                                                                                                                 | - Well differentiated<br>- BAC* histology<br>- Stage I tumors<br>- Lower smoking history<br>- Better survival outcome |
| Garber et al.<br>2001 [2]<br>146 genes        | AC1        | -               | - Surfactant proteins                                                                                                                                                                  | - Well differentiated<br>- Good prognosis<br>- Glandular differentiation                                              |
|                                               | AC2        | -               | - Surfactant proteins<br>- p16 expression                                                                                                                                              | - Heterogeneous differentiation<br>- Better survival outcome                                                          |
|                                               | AC3        | -               | - p16 expression<br>- Tissue remodeling<br>- Angiogenesis<br>- WNT signaling inhibitor<br>- Metabolic enzymes                                                                          | - Metastatic tumors<br>- Worse survival outcome<br>- Poor differentiation                                             |
| Beer et al.<br>2002 [3]<br>4966 genes         | Cluster 1  | -               |                                                                                                                                                                                        | - Well differentiated<br>- BAC histology                                                                              |
|                                               | Cluster 2  | -               |                                                                                                                                                                                        |                                                                                                                       |
|                                               | Cluster 3  | -               |                                                                                                                                                                                        | - Poor differentiation<br>- Stage III tumors<br>- Worse survival outcome                                              |
| Tomida et al.<br>2004 [4]<br>829 genes        | AD1        | -               | - Low peripheral lung markers expression                                                                                                                                               |                                                                                                                       |
|                                               | AD2        | -               | - High EST*** expression                                                                                                                                                               |                                                                                                                       |
|                                               | AD3        | -               | - Peripheral lung markers expression                                                                                                                                                   | - Females<br>- Non-smokers<br>- Well differentiated                                                                   |
|                                               | AD4        | -               | - Low EST expression                                                                                                                                                                   |                                                                                                                       |
| Hayes et al.<br>2006 [5]<br>2555 genes        | Bronchioid | EGFR            | - Growth, development differentiation and survival<br>- Extracellular matrix and matrix metalloproteinases<br>- Type II pneumocyte<br>- Cisplatin resistance, radiation and DNA repair | - Well differentiated<br>- Females<br>- Non-smokers<br>- BAC histology<br>- Better survival outcome                   |
|                                               | Squamoid   | KRAS            | - WNT-HDAC2, APC (decreased)<br>- Angiogenesis                                                                                                                                         | - Poor differentiation<br>- Worse survival outcome                                                                    |

|                                            |                              |                                            |                                                                                                                                                                          |                                                                                                                                                                                                                       |
|--------------------------------------------|------------------------------|--------------------------------------------|--------------------------------------------------------------------------------------------------------------------------------------------------------------------------|-----------------------------------------------------------------------------------------------------------------------------------------------------------------------------------------------------------------------|
|                                            | Magnoid                      |                                            | - Complement<br>- Zellweger's syndrome<br>- Translation<br>- Chemotherapy response                                                                                       |                                                                                                                                                                                                                       |
|                                            |                              |                                            | - Inflammatory genes<br>- Cytoskeleton<br>- Hematopoietic markers<br>- Lung/epithelial markers<br>- Proliferation<br>- Chemotherapy response<br>- Neuroendocrine markers | - Poor differentiation<br>- Worse survival outcome                                                                                                                                                                    |
| Takeuchi et al.<br>2006 [6]<br>293 genes   | TRU                          | <i>EGFR</i>                                | - Surfactant proteins<br>- Type II pneumocyte<br>- Normal lung functions                                                                                                 | - Well differentiated<br>- Females<br>- Non-smokers<br>- Better survival outcome                                                                                                                                      |
|                                            | non-TRU                      | <i>KRAS, TP53</i>                          | - Proliferation<br>- Cell division<br>- Necrosis<br>- Invasive growth                                                                                                    | - Worse survival outcome                                                                                                                                                                                              |
| Shibata et al.<br>2007 [7]<br>78 genes     | Bronchial                    | <i>KRAS</i>                                | - Cell cycle<br>- Proliferation<br>- Extracellular matrix<br>- Bronchial epithelium                                                                                      | - Males<br>- Poor differentiation<br>- Solid growth<br>- Worse survival outcome                                                                                                                                       |
|                                            | Alveolar                     | <i>EGFR</i>                                | - Growth factor inhibitors<br>- Lipid metabolism<br>- Alveolar pneumocyte markers                                                                                        | - Lepidic growth<br>- Better survival outcome                                                                                                                                                                         |
| Park et al.<br>2012 [8]<br>191 genes       | F_C1                         |                                            | - Cell cycle<br>- Proliferation<br>- Loss of p53 activity                                                                                                                | - Worse survival outcome<br>- Late stages<br>- Benefit adjuvant therapy                                                                                                                                               |
|                                            | S_C2                         |                                            |                                                                                                                                                                          | - Better survival outcome<br>- Early stages                                                                                                                                                                           |
| Staaf et al.<br>2012 [9]<br>176 genes      | AC1                          |                                            | - Increased EGFR activity                                                                                                                                                | - Non-smokers                                                                                                                                                                                                         |
|                                            | AC2                          |                                            | - KIT overexpression<br>- Proliferation                                                                                                                                  | - Smokers                                                                                                                                                                                                             |
| Wilkerson et al.<br>2012 [10]<br>506 genes | Bronchioid                   | <i>EGFR</i>                                |                                                                                                                                                                          | - Females<br>- Non-smokers<br>- Early stage<br>- Low grade tumors<br>- Acinar content<br>- Less necrosis<br>- Less invasion<br>- Adenosquamous features<br>- Better survival outcome<br>- Potential EGFR-TKI response |
|                                            |                              |                                            | - Excretion genes<br>- Asthma genes<br>- Surfactant proteins                                                                                                             |                                                                                                                                                                                                                       |
|                                            | Squamoid                     |                                            | - Immune response genes                                                                                                                                                  | - High grade tumors<br>- Solid content<br>- Lowest papillary content<br>- Adenosquamous features<br>- Worse survival outcome                                                                                          |
|                                            | Magnoid                      | <i>TP53</i><br><i>KRAS</i><br><i>STK11</i> | - DNA repair genes<br>- Highest mutation rate<br>- Hypermethylation                                                                                                      | - Smokers<br>- Worse survival outcome                                                                                                                                                                                 |
| Cheung et al.<br>2013 [11]<br>249 genes    | Alveolar                     |                                            | - Surfactant proteins<br>- GATA family binding sites                                                                                                                     | - Well differentiated<br>- Better survival outcome                                                                                                                                                                    |
|                                            | Distal airway stem cell-like |                                            | - WNT expression<br>- E2F and MYC expression                                                                                                                             | - Poor differentiation<br>- Epithelial features                                                                                                                                                                       |

|                                                         |             |                             |                                                                                                                                                                                                                                                                                                       |
|---------------------------------------------------------|-------------|-----------------------------|-------------------------------------------------------------------------------------------------------------------------------------------------------------------------------------------------------------------------------------------------------------------------------------------------------|
| (DASC)                                                  |             |                             | - Metastasis and progression<br>- Worse survival outcome                                                                                                                                                                                                                                              |
| Fukui et al.<br>2013 [12]<br>1829 genes                 | BC-Low      |                             | - Type II pneumocyte expression<br>- Surfactant proteins                                                                                                                                                                                                                                              |
|                                                         | BC-High     |                             | - Cell cycle<br>- Extracellular matrix<br>- TP53 pathway<br>- Epithelial mesenchymal transition<br>- TGF- $\beta$<br>- Worse survival outcome                                                                                                                                                         |
| Collison et al.<br>2014 [13]<br>506 genes               | TRU         | <i>EGFR</i>                 | - Excretion genes<br>- Asthma genes<br>- Surfactant proteins<br>- Better survival outcome<br>- Acinar content                                                                                                                                                                                         |
|                                                         | PI          | <i>TP53</i><br><i>NF1</i>   | - Immune response genes<br>- Lepidic content<br>- Worse survival outcome                                                                                                                                                                                                                              |
|                                                         | PP          | <i>KRAS</i><br><i>STK11</i> | - DNA repair genes<br>- Proliferation<br>- Worse survival outcome                                                                                                                                                                                                                                     |
| Ringnér et al.<br>2016 [14]<br>Consensus classification | CONSENSUS_1 | <i>EGFR</i>                 | - Surfactant proteins<br>- More dependent on oncogenic alterations<br>- Better survival<br>- Early stage<br>- Non-smokers<br>- Females                                                                                                                                                                |
|                                                         | CONSENSUS_2 | <i>KRAS</i>                 | - Proliferation<br>- Decreased immune response<br>- Decreased extracellular matrix genes<br>- Smoking-related mutational signature<br>- Worse survival<br>- Younger patients<br>- Smokers                                                                                                             |
|                                                         | CONSENSUS_3 |                             | - Proliferation<br>- Extracellular matrix genes<br>- Immune response<br>- Immune infiltration<br>- Basal/squamous related genes<br>- Smoking-related mutational signature<br>- Worse survival<br>- Lower tumor purity<br>- Smokers                                                                    |
| Chen et al.<br>2017 [15]<br>700 genes                   | AD.1        | <i>STK11</i><br><i>TP53</i> | - LCNEC features<br>- Potential platinum-based therapy sensitivity<br>- Potential immunotherapy sensitivity<br>- Cancer testis antigens expression                                                                                                                                                    |
|                                                         | AD.2        | <i>KRAS</i><br><i>TP53</i>  | - CpG island methylator phenotype<br>- Immune infiltration<br>- Immune checkpoints expression<br>- Potential immune checkpoint inhibitors therapy sensitivity                                                                                                                                         |
|                                                         | AD.3        | <i>TP53</i>                 | - Immune infiltration<br>- Cancer testis antigens expression<br>- Immune checkpoints expression<br>- Potential immunotherapy sensitivity<br>- Potential immune checkpoint inhibitors therapy sensitivity                                                                                              |
|                                                         | AD.4        |                             | - Immune infiltration<br>- Immune checkpoints expression<br>- Low neoepitope count<br>- Low mutation rate<br>- Better survival outcome<br>- Potential p38-related therapy sensitivity<br>- Potential mTOR-related therapy sensitivity<br>- Potential immune checkpoint inhibitors therapy sensitivity |
|                                                         | AD.5a       |                             | p38 pathway activation<br>mTOR pathway activation<br>Low mutation rate<br>- Non-smokers<br>- Better survival outcome<br>- Potential p38-related therapy                                                                                                                                               |

|                                    |           |                             |                                                                                                       |                                              |
|------------------------------------|-----------|-----------------------------|-------------------------------------------------------------------------------------------------------|----------------------------------------------|
| Hu et al.<br>2019 [16]<br>30 genes | AD5.b     | <i>KRAS</i><br><i>STK11</i> | - CpG island methylator phenotype                                                                     | apy sensitivity                              |
|                                    |           |                             | - Low mutation rate                                                                                   | - Potential mTOR-related therapy sensitivity |
|                                    | Subtype 1 | <i>TP53</i>                 | - p38 pathway activation                                                                              | - Non-smokers                                |
|                                    |           |                             | - mTOR pathway activation                                                                             | - Better survival outcome                    |
|                                    | Subtype 2 | <i>TP53</i>                 | - Low smoking-related mutational signature                                                            |                                              |
|                                    |           |                             | - Immune-related biological processes                                                                 | - Worse survival outcome                     |
|                                    | Subtype 3 |                             | - Chromatid cohesion<br>- Mitotic nuclear division<br>- Cell division                                 |                                              |
|                                    | Subtype 4 | <i>EGFR</i>                 | - Collagen fibril organization<br>- Collagen catabolic process<br>- Extracellular matrix organization | - Better survival outcome                    |
|                                    |           |                             | - PI3K-Akt signaling<br>- Focal adhesion                                                              |                                              |

**Table S2.** Intrinsic lung squamous cell carcinoma transcriptional subtypes and their association with genomic alterations, molecular features and clinical covariates.

| Signature                                  | Subtype   | DNA Alterations           | Molecular Features                                                                                                                  | Clinical Covariates                                             |
|--------------------------------------------|-----------|---------------------------|-------------------------------------------------------------------------------------------------------------------------------------|-----------------------------------------------------------------|
| Tomida et al.<br>2004 [4]<br>829 genes     | SQ1       | -                         | - Extracellular matrix<br>- Proliferation<br>- Infiltrative growth pattern<br>- High keratinization                                 | - Worse survival outcome                                        |
|                                            | SQ2       | -                         | - Well circumscribed expansive growth pattern<br>- Low keratinization                                                               | - Better survival outcome                                       |
| Inamura et al.<br>2005 [17]<br>3344 genes  | SCC-A     | -                         | - Proliferation                                                                                                                     | - Worse survival outcome                                        |
|                                            | SCC-B     | -                         | - AKT2 overexpression<br>- MAPKK cascade<br>- Ceramide metabolism<br>- Apoptosis                                                    | - Better survival outcome                                       |
| Raponi et al.<br>2006 [18]<br>11101 genes  | Cluster 1 | -                         |                                                                                                                                     | - Worse survival outcome                                        |
|                                            | Cluster 2 | -                         |                                                                                                                                     | - Better survival outcome                                       |
| Larsen et al.<br>2007 [19]<br>6748 genes   | Cluster 1 | -                         |                                                                                                                                     | - Worse survival outcome<br>- Poor differentiation              |
|                                            | Cluster 2 | -                         |                                                                                                                                     | - Better survival outcome                                       |
| Wilkerson et al.<br>2010 [20]<br>208 genes | Primitive | -                         | - Proliferation<br>- DNA repair                                                                                                     | - Poor differentiation<br>- Females<br>- Worse survival outcome |
|                                            | Basal     | -                         | - <i>S100A8</i> expression<br>- Cell adhesion<br>- Epidermal development                                                            | - Well differentiated                                           |
|                                            | Secretory | -                         | - <i>KRT7</i> expression<br>- Immune response<br>- T cell activation<br>- Positive regulation NFkB pathway<br>- Surfactant proteins | - Stage III tumors                                              |
|                                            | Classical | 3q27-28 amplification     | - <i>TP63</i> expression<br>- Oxidative metabolism<br>- Xenobiotic metabolism                                                       | - Smokers<br>- Stage III tumors<br>- Males                      |
| Hammerman et al.<br>2012 [21]              | Primitive | <i>RB1</i><br><i>PTEN</i> | - Proliferation<br>- DNA repair                                                                                                     |                                                                 |

|                                            |             |                                                                    |                                                                                                                                                                 |                                                                         |
|--------------------------------------------|-------------|--------------------------------------------------------------------|-----------------------------------------------------------------------------------------------------------------------------------------------------------------|-------------------------------------------------------------------------|
| 208 genes                                  | Basal       | <i>NF1</i>                                                         | - <i>S100A8</i> expression<br>- Cell adhesion<br>- Epidermal development                                                                                        |                                                                         |
|                                            | Secretory   |                                                                    | - <i>KRT7</i> expression<br>- Immune response<br>- T cell activation<br>- Positive regulation NFKB pathway<br>- Surfactant proteins                             |                                                                         |
|                                            | Classical   | <i>KEAP1</i><br><i>NFE2L2</i><br><i>PTEN</i><br>3q26 amplification | - Hypermethylation<br>- Chromosomal instability<br>- Oxidative metabolism<br>- <i>SOX2</i> expression<br>- <i>TP63</i> expression<br>- <i>PI3KCA</i> expression |                                                                         |
|                                            | Classical_1 | <i>TP53</i>                                                        | - Glycolysis<br>- TP53 targets<br>- Senescence<br>- Cell adhesion<br>- Apoptosis<br>- Keratins<br>- Drug metabolism                                             | - Well differentiated<br>- Better survival outcome                      |
| Brambilla et al.<br>2014 [22]<br>139 genes | Classical_2 |                                                                    | - Glycolysis<br>- Oxidative phosphorylation<br>- Keratins<br>- Drug metabolism<br>- Metastasis<br>- Proliferation                                               | - Well differentiated                                                   |
|                                            | PEA         |                                                                    | - NRAS signaling<br>- Immune response<br>- Surfactant proteins<br>- Senescence<br>- TP53 targets<br>- Cell adhesion<br>- Apoptosis<br>- Cell motility           | - Stage I tumors<br>- Alveolar features<br>- Poor differentiation       |
|                                            | BL          |                                                                    | - Basal cells signatures expression<br>- Oxidative phosphorylation<br>- Proliferation<br>- Testis antigens expression<br>- Metastasis                           | - Basaloid histology<br>- Late-stage tumors<br>- Worse survival outcome |
|                                            | SQ.1        |                                                                    | - Epithelial mesenchymal transition<br>- <i>SOX2</i> expression<br>- <i>TP63</i> expression<br>- Immune infiltration                                            | Worse survival outcome                                                  |
| Chen et al.<br>2017 [15]<br>700 genes      | SQ.2a       | <i>SOX2</i> copy gain<br><i>TP53</i>                               | - <i>SOX2</i> expression<br>- Immune infiltration                                                                                                               | Better survival outcome                                                 |
|                                            | SQ.2b       | <i>SOX2</i> copy gain<br><i>TP53</i>                               | - <i>SOX2</i> expression                                                                                                                                        | Better survival outcome                                                 |

**Table S3.** Identified NSCLC prognostic signatures published in the last 5 years (2016–2021).

| Scheme .          | Year | Journal               | Reference | Tissue of origin | Number of genes | Technology         | Public datasets accession numbers                                                                                                                                                                                                                                                                                                                                                                                                                                                                             |
|-------------------|------|-----------------------|-----------|------------------|-----------------|--------------------|---------------------------------------------------------------------------------------------------------------------------------------------------------------------------------------------------------------------------------------------------------------------------------------------------------------------------------------------------------------------------------------------------------------------------------------------------------------------------------------------------------------|
| Chen et al.       | 2016 | Oncotarget            | [23]      | AD               | 72              | Microarray         | <a href="#">GSE31210</a> , <a href="#">GSE19188</a> , <a href="#">GSE19804</a>                                                                                                                                                                                                                                                                                                                                                                                                                                |
| Shahid et al.     | 2016 | Oncotarget            | [24]      | NSCLC            | 8               | Microarray         | <a href="#">GSE50081</a> , <a href="#">GSE31210</a> , <a href="#">GSE30219</a> , <a href="#">GSE29013</a> , <a href="#">E-MTAB-923</a> , <a href="#">GSE68465</a> , <a href="#">GSE42127</a>                                                                                                                                                                                                                                                                                                                  |
| Xu et al.         | 2016 | J. Thorac. Oncol.     | [25]      | NSCLC            | 10              | Microarray/RNA-Seq | <a href="#">GSE3141</a> , <a href="#">GSE83227</a> , <a href="#">GSE68465</a> , TCGA-LUAD, <a href="#">GSE31210</a> , <a href="#">GSE13213</a> , <a href="#">GSE42127</a> , <a href="#">E-MTAB-923</a> , <a href="#">GSE14814</a> , <a href="#">GSE11969</a> , <a href="#">GSE41271</a> , <a href="#">GSE50081</a>                                                                                                                                                                                            |
| Krzystanek et al. | 2016 | Biomarker Research    | [26]      | AD               | 7               | Microarray/RNA-Seq | <a href="#">GSE8894</a> , <a href="#">GSE14814</a> , <a href="#">GSE30219</a> , <a href="#">GSE31210</a> , <a href="#">GSE37745</a> , <a href="#">GSE50081</a> , <a href="#">GSE68465</a> , TCGA-LUAD                                                                                                                                                                                                                                                                                                         |
| Zhang et al.      | 2016 | Nat. Commun.          | [27]      | Lung and Others  | 14              | Microarray         | <a href="#">GSE37745</a> , <a href="#">GSE42127</a> , <a href="#">GSE31210</a>                                                                                                                                                                                                                                                                                                                                                                                                                                |
| Shukla et al.     | 2016 | J. Natl. Cancer Inst. | [28]      | AD               | 4               | RNA-Seq            | TCGA-LUAD                                                                                                                                                                                                                                                                                                                                                                                                                                                                                                     |
| Li et al.         | 2017 | JAMA Oncology         | [29]      | Non-SCC NSCLC    | 40              | Microarray/RNA-Seq | TCGA-LUAD, <a href="#">GSE68465</a> , <a href="#">GSE30219</a> , <a href="#">GSE31210</a> , <a href="#">GSE41271</a> , <a href="#">GSE50081</a> , <a href="#">GSE13213</a> , <a href="#">GSE26939</a> , <a href="#">GSE83227</a> , <a href="#">GSE11969</a> , <a href="#">GSE42127</a> , <a href="#">GSE68571</a> , <a href="#">GSE19188</a> , <a href="#">GSE3141</a> , <a href="#">GSE37745</a> , <a href="#">GSE10245</a> , <a href="#">GSE14814</a> , <a href="#">GSE31547</a> , <a href="#">GSE31546</a> |
| Namani et al.     | 2017 | Oncotarget            | [30]      | NSCLC            | 12              | Microarray/RNA-Seq | TCGA-LUAD, <a href="#">GSE3141</a> , <a href="#">GSE8894</a> , <a href="#">GSE13213</a> , <a href="#">GSE31210</a> , <a href="#">GSE42127</a> , <a href="#">GSE37745</a> , Roepman                                                                                                                                                                                                                                                                                                                            |
| Chen et al.       | 2017 | Oncotarget            | [31]      | AD               | 27              | Microarray         | <a href="#">GSE31210</a> , <a href="#">GSE19188</a> , <a href="#">GSE19804</a>                                                                                                                                                                                                                                                                                                                                                                                                                                |
| Li et al.         | 2017 | J. Cell Physiol.      | [32]      | SCC              | 4               | RNA-Seq            | TCGA-LUSC                                                                                                                                                                                                                                                                                                                                                                                                                                                                                                     |
| Higgs et al.      | 2018 | Clin. Cancer Res.     | [33]      | NSCLC            | 4               | RNA-Seq            | 1108/ <a href="#">NCT01693562</a> , TCGA-LUAD, TCGA-LUSC                                                                                                                                                                                                                                                                                                                                                                                                                                                      |
| Zheng et al.      | 2018 | Int. J. Cancer        | [34]      | AD               | 8               | Microarray/RNA-Seq | TCGA-LUAD, <a href="#">GSE31210</a> , <a href="#">GSE50081</a> , <a href="#">GSE81089</a> , FUSCC cohort                                                                                                                                                                                                                                                                                                                                                                                                      |
| Zhang et al.      | 2018 | Int. J. Med. Sci.     | [35]      | AD               | 3               | Microarray/RNA-Seq | <a href="#">GSE31210</a> , <a href="#">GSE32863</a> , <a href="#">GSE40791</a> , <a href="#">GSE43458</a> , <a href="#">GSE75037</a> , TCGA-LUAD                                                                                                                                                                                                                                                                                                                                                              |
| Li et al.         | 2018 | Cancer Sci.           | [36]      | AD, SCC          | 17              | Microarray         | <a href="#">GSE13213</a> , <a href="#">GSE68465</a> , <a href="#">GSE83227</a> , <a href="#">GSE8894</a> , <a href="#">GSE19188</a> , <a href="#">GSE8894</a> , <a href="#">GSE4573</a> , <a href="#">GSE14814</a> , <a href="#">GSE43767</a>                                                                                                                                                                                                                                                                 |
| Zuo et al.        | 2019 | J. Transl. Med.       | [37]      | NSCLC            | 6               | Microarray/RNA-Seq | <a href="#">GSE31210</a> , <a href="#">GSE50081</a> , <a href="#">GSE37745</a> , TCGA-LUSC, TCGA-LUAD                                                                                                                                                                                                                                                                                                                                                                                                         |
| Xie et al.        | 2019 | Biomed. Res. Int.     | [38]      | NSCLC            | 6               | Microarray/RNA-Seq | <a href="#">GSE19188</a> , <a href="#">GSE30219</a> , <a href="#">GSE10072</a> , <a href="#">GSE7670</a> , <a href="#">GSE2514</a> , <a href="#">GSE32863</a> , <a href="#">GSE21933</a> , <a href="#">GSE40275</a> , <a href="#">GSE12472</a> , <a href="#">GSE80796</a> , <a href="#">GSE8500</a> , <a href="#">GSE85841</a> , <a href="#">GSE19027</a> , <a href="#">GSE11969</a> , TCGA-LUAD                                                                                                              |
| Wu et al.         | 2019 | Cancer Med.           | [39]      | AD               | 5               | Microarray/RNA-Seq | <a href="#">GSE68465</a> , <a href="#">GSE13213</a> , TCGA-LUAD                                                                                                                                                                                                                                                                                                                                                                                                                                               |
| Jan et al.        | 2019 | Sci. Rep.             | [40]      | AD               | 118             | RNA-Seq            | TCGA-LUAD                                                                                                                                                                                                                                                                                                                                                                                                                                                                                                     |

|              |      |                        |      |       |    |                    |                                                                                                                                                                                                                                                                                                                                                                       |
|--------------|------|------------------------|------|-------|----|--------------------|-----------------------------------------------------------------------------------------------------------------------------------------------------------------------------------------------------------------------------------------------------------------------------------------------------------------------------------------------------------------------|
| Wang et al.  | 2019 | Onco. Tar-gets Ther.   | [41] | SCC   | 7  | RNA-Seq            | TCGA-LUSC                                                                                                                                                                                                                                                                                                                                                             |
| Zhang et al. | 2019 | J. Gene Med.           | [42] | SCC   | 17 | Microarray/RNA-Seq | TCGA-LUSC, <a href="#">GSE14814</a> , <a href="#">GSE50081</a> , <a href="#">GSE30219</a> , <a href="#">GSE37745</a> , <a href="#">GSE29013</a> , <a href="#">GSE3141</a> , <a href="#">GSE19188</a>                                                                                                                                                                  |
| Liu et al.   | 2019 | Cell Cycle             | [43] | AD    | 4  | RNA-Seq            | TCGA-LUAD                                                                                                                                                                                                                                                                                                                                                             |
| Li et al.    | 2020 | Biomed. Res. Int.      | [44] | NSCLC | 5  | Microarray/RNA-Seq | <a href="#">GSE103584</a> , <a href="#">GSE31210</a> , <a href="#">GSE41271</a> , TCGA-LUAD                                                                                                                                                                                                                                                                           |
| Liu et al.   | 2020 | J. Cell Physiol.       | [45] | NSCLC | 8  | RNA-Seq            | TCGA-LUAD, TCGA-LUSC                                                                                                                                                                                                                                                                                                                                                  |
| Liu et al.   | 2020 | Aging                  | [46] | NSCLC | 7  | Microarray/RNA-Seq | TCGA-LUAD, TCGA-LUSC, <a href="#">GSE30219</a> , <a href="#">GSE41271</a> , <a href="#">GSE42127</a> , <a href="#">GSE50081</a>                                                                                                                                                                                                                                       |
| Li et al.    | 2020 | Int. J. Mol. Sci.      | [47] | AD    | 8  | Microarray/RNA-Seq | <a href="#">GSE18842</a> , <a href="#">GSE75037</a> , <a href="#">GSE101929</a> , <a href="#">GSE19188</a> , TCGA-LUAD                                                                                                                                                                                                                                                |
| Liu et al.   | 2020 | Aging                  | [48] | NSCLC | 22 | Microarray/RNA-Seq | TCGA-LUSC, TCGA-LUAD, <a href="#">GSE31210</a> , <a href="#">GSE30219</a> , <a href="#">GSE3141</a> , <a href="#">GSE8894</a>                                                                                                                                                                                                                                         |
| Li et al.    | 2020 | Lipids Health Dis.     | [49] | AD    | 6  | Microarray/RNA-Seq | TCGA-LUAD, <a href="#">GSE13213</a>                                                                                                                                                                                                                                                                                                                                   |
| Li et al.    | 2020 | Oncol. Rep.            | [50] | NSCLC | 10 | Microarray/RNA-Seq | <a href="#">GSE103584</a> , <a href="#">GSE31210</a> , TCGA-LUAD, TCGA-LUSC                                                                                                                                                                                                                                                                                           |
| Fan et al.   | 2020 | Aging                  | [51] | AD    | 4  | RNA-Seq            | TCGA-LUAD                                                                                                                                                                                                                                                                                                                                                             |
| Ma et al.    | 2020 | Front. Mol. Biosci.    | [52] | AD    | 8  | Microarray/RNA-Seq | TCGA-LUAD, <a href="#">GSE72094</a>                                                                                                                                                                                                                                                                                                                                   |
| Han et al.   | 2020 | Cancer Med.            | [53] | AD    | 6  | Microarray/RNA-Seq | <a href="#">GSE37745</a> , <a href="#">GSE30219</a> , TCGA-LUAD                                                                                                                                                                                                                                                                                                       |
| Ma et al.    | 2020 | Biomed. Res. Int.      | [54] | SCC   | 5  | Microarray/RNA-Seq | TCGA-LUSC, <a href="#">GSE42127</a>                                                                                                                                                                                                                                                                                                                                   |
| Bao et al.   | 2020 | J. Mol. Med. (Berl.)   | [55] | AD    | 12 | Microarray/RNA-Seq | <a href="#">GSE42127</a> , <a href="#">GSE37745</a> , <a href="#">GSE50081</a> , <a href="#">GSE29013</a> , <a href="#">GSE72094</a> , TCGA-LUAD                                                                                                                                                                                                                      |
| Yu et al.    | 2020 | J. Oncol.              | [56] | AD    | 5  | Microarray/RNA-Seq | <a href="#">GSE72094</a> , TCGA-LUAD                                                                                                                                                                                                                                                                                                                                  |
| Tang et al.  | 2020 | Aging                  | [57] | AD    | 9  | Microarray/RNA-Seq | <a href="#">GSE31210</a> , <a href="#">GSE41271</a> , TCGA-LUAD                                                                                                                                                                                                                                                                                                       |
| Jiang et al. | 2020 | BMC Cancer             | [58] | AD    | 10 | Microarray/RNA-Seq | <a href="#">GSE75037</a> , TCGA-LUAD                                                                                                                                                                                                                                                                                                                                  |
| He et al.    | 2020 | Mol. Ther. Oncolytics  | [59] | AD    | 13 | Microarray/RNA-Seq | <a href="#">GSE31210</a> , <a href="#">GSE30219</a> , TCGA-LUAD                                                                                                                                                                                                                                                                                                       |
| Song et al.  | 2020 | Front. Oncol.          | [60] | AD    | 4  | Microarray/RNA-Seq | <a href="#">GSE68465</a> , TCGA-LUAD                                                                                                                                                                                                                                                                                                                                  |
| Ma et al.    | 2020 | PeerJ.                 | [61] | SCC   | 7  | Microarray/RNA-Seq | <a href="#">GSE19188</a> , <a href="#">GSE33532</a> , <a href="#">GSE33479</a> , TCGA-LUSC                                                                                                                                                                                                                                                                            |
| Zhao et al.  | 2020 | PeerJ.                 | [62] | AD    | 23 | Microarray/RNA-Seq | <a href="#">GSE30219</a> , <a href="#">GSE72094</a> , TCGA-LUAD                                                                                                                                                                                                                                                                                                       |
| Sun et al.   | 2020 | Ther. Adv. Med. Oncol. | [63] | AD    | 16 | Microarray/RNA-Seq | <a href="#">GSE72094</a> , <a href="#">GSE31210</a> , <a href="#">GSE30219</a> , <a href="#">GSE37745</a> , <a href="#">GSE50081</a> , <a href="#">GSE42127</a> , <a href="#">GSE41271</a> , TCGA-LUAD                                                                                                                                                                |
| Wu et al.    | 2020 | J. Int. Med. Res.      | [64] | NSCLC | 5  | Microarray/RNA-Seq | <a href="#">GSE30219</a> , <a href="#">GSE37745</a> , <a href="#">GSE50081</a> , TCGA-LUAD, TCGA-LUSC                                                                                                                                                                                                                                                                 |
| Li et al.    | 2020 | Front. Genet.          | [65] | SCC   | 9  | Microarray/RNA-Seq | <a href="#">GSE73403</a> , TCGA-LUSC                                                                                                                                                                                                                                                                                                                                  |
| Guo et al.   | 2020 | J. Transl. Med.        | [66] | AD    | 10 | Microarray/RNA-Seq | TCGA-LUAD, <a href="#">GSE31210</a> , <a href="#">GSE72094</a>                                                                                                                                                                                                                                                                                                        |
| Zhang et al. | 2020 | Biomed. Res. Int.      | [67] | AD    | 7  | Microarray/RNA-Seq | <a href="#">GSE26939</a> , TCGA-LUAD                                                                                                                                                                                                                                                                                                                                  |
| Nema et al.  | 2020 | Comput. Biol. Med.     | [68] | AD    | 3  | Microarray/RNA-Seq | <a href="#">GSE14814</a> , <a href="#">GSE19188</a> , <a href="#">GSE29013</a> , <a href="#">GSE30219</a> , <a href="#">GSE31210</a> , <a href="#">GSE3141</a> , <a href="#">GSE31908</a> , <a href="#">GSE37745</a> , <a href="#">GSE37745</a> , <a href="#">GSE43580</a> , <a href="#">GSE4573</a> , <a href="#">GSE50081</a> , <a href="#">GSE8894</a> , TCGA-LUAD |



|               |      |                          |      |                                  |     |                    |                                                                                                                                                  |
|---------------|------|--------------------------|------|----------------------------------|-----|--------------------|--------------------------------------------------------------------------------------------------------------------------------------------------|
| Yang et al.   | 2020 | PeerJ.                   | [69] | AD                               | 6   | Microarray/RNA-Seq | <a href="#">GSE31210</a> , <a href="#">GSE37745</a> , TCGA-LUAD                                                                                  |
| Wu et al.     | 2020 | J. Transl. Med.          | [70] | AD                               | 21  | Microarray/RNA-Seq | <a href="#">GSE30219</a> , <a href="#">GSE31210</a> , <a href="#">GSE50081</a> , <a href="#">GSE72094</a> , TCGA-LUAD                            |
| Wu et al.     | 2020 | Int. Immunopharmacol.    | [71] | AD                               | 7   | Microarray/RNA-Seq | <a href="#">GSE10072</a> , <a href="#">GSE31210</a> , <a href="#">GSE40791</a> , TCGA-LUAD                                                       |
| Zou et al.    | 2020 | Med. Sci. Monit.         | [72] | AD                               | 7   | Microarray/RNA-Seq | <a href="#">GSE30219</a> , <a href="#">GSE41271</a> , <a href="#">GSE42127</a> , TCGA-LUAD                                                       |
| Li et al.     | 2020 | BMC Cancer               | [73] | AD                               | 4   | Microarray/RNA-Seq | <a href="#">GSE42127</a> , TCGA-LUAD                                                                                                             |
| Zengin et al. | 2020 | BMC Bioinformatics       | [74] | AD                               | 12  | RNA-Seq            | TCGA-LUAD                                                                                                                                        |
| Zhao et al.   | 2020 | Immunogenetics           | [75] | AD                               | 8   | Microarray/RNA-Seq | <a href="#">GSE30219</a> , <a href="#">GSE31210</a> , <a href="#">GSE3141</a> , <a href="#">GSE37745</a> , <a href="#">GSE50081</a> , TCGA-LUAD  |
| Cao et al.    | 2020 | PeerJ.                   | [76] | AD                               | 6   | Microarray/RNA-Seq | TCGA-LUAD, <a href="#">GSE68465</a>                                                                                                              |
| Zhao et al.   | 2020 | Lung Cancer              | [77] | AD                               | 19  | Microarray/RNA-Seq | <a href="#">GSE30219</a> , <a href="#">GSE31210</a> , <a href="#">GSE50081</a> , TCGA-LUAD                                                       |
| Zheng et al.  | 2020 | Biomed. Res. Int.        | [78] | AD                               | 5   | Microarray/RNA-Seq | <a href="#">GSE30219</a> , <a href="#">GSE31210</a> , <a href="#">GSE50081</a> , TCGA-LUAD                                                       |
| Ma et al.     | 2021 | Sci. Rep.                | [79] | NSCLC                            | 15  | Microarray         | <a href="#">GSE30219</a> , <a href="#">GSE31210</a> , <a href="#">GSE50081</a>                                                                   |
| Yan et al.    | 2021 | Sci. Rep.                | [80] | SCC                              | 3   | Microarray/RNA-Seq | <a href="#">GSE73403</a> , TCGA-LUSC                                                                                                             |
| Ma et al.     | 2021 | Aging                    | [81] | AD                               | 8   | Microarray/RNA-Seq | <a href="#">GSE31210</a> , <a href="#">GSE30219</a> , <a href="#">GSE13213</a> , <a href="#">GSE50081</a> , TCGA-LUAD                            |
| Zhang et al.  | 2021 | Biomed. Res. Int.        | [82] | NSCLC                            | 6   | Microarray/RNA-Seq | <a href="#">GSE41271</a> , <a href="#">GSE81089</a> , TCGA-LUSC, TCGA-LUAD                                                                       |
| Yao et al.    | 2021 | J. Cancer                | [83] | NSCLC                            | 5   | RNA-Seq            | TCGA-LUAD, TCGA-LUSC                                                                                                                             |
| Yang et al.   | 2021 | PeerJ.                   | [84] | AD                               | 11  | Microarray/RNA-Seq | <a href="#">GSE68465</a> , TCGA-LUAD                                                                                                             |
| Ma et al.     | 2021 | Transl. Lung Cancer Res. | [85] | AD                               | 3   | Microarray/RNA-Seq | <a href="#">GSE68571</a> , <a href="#">GSE72094</a> , TCGA-LUAD                                                                                  |
| Wang et al.   | 2021 | PeerJ.                   | [86] | AD                               | 5   | Microarray/RNA-Seq | <a href="#">GSE68465</a> , <a href="#">GSE41271</a> , TCGA-LUAD                                                                                  |
| Xu et al.     | 2021 | Cancer Med.              | [87] | SCC                              | 5   | RNA-Seq            | TCGA-LUSC                                                                                                                                        |
| Tu et al.     | 2021 | PeerJ.                   | [88] | AD                               | 8   | Microarray/RNA-Seq | <a href="#">GSE31210</a> , <a href="#">GSE32665</a> , <a href="#">GSE32863</a> , <a href="#">GSE43458</a> , <a href="#">GSE72094</a> , TCGA-LUAD |
| Zhu et al.    | 2021 | Thorac. Cancer           | [89] | AD                               | 10  | Microarray/RNA-Seq | TCGA-LUAD, <a href="#">GSE31210</a>                                                                                                              |
| Xu et al.     | 2021 | Aging                    | [90] | AD                               | 5   | RNA-Seq            | TCGA-LUAD                                                                                                                                        |
| Chen et al.   | 2021 | PeerJ.                   | [91] | AD                               | 106 | Microarray/RNA-Seq | TCGA-LUAD, <a href="#">GSE68465</a> , <a href="#">GSE14814</a>                                                                                   |
| Yang et al.   | 2021 | Ann. Transl. Med.        | [92] | AD                               | 9   | Microarray/RNA-Seq | TCGA-LUAD, <a href="#">GSE13213</a>                                                                                                              |
| Miao et al.   | 2021 | Front. Oncol.            | [93] | Lung cancer coexisting with COPD | 5   | RNA-Seq            | TCGA-LUAD, TCGA-LUSC                                                                                                                             |
| Wang et al.   | 2021 | Cancer Cell Int.         | [94] | AD                               | 6   | Microarray/RNA-Seq | TCGA-LUAD, <a href="#">GSE31210</a>                                                                                                              |

## References

1. Bhattacharjee, A.; Richards, W.G.; Staunton, J.; Li, C.; Monti, S.; Vasa, P.; Ladd, C.; Beheshti, J.; Bueno, R.; Gillette, M.; et al. Classification of human lung carcinomas by mRNA expression profiling reveals distinct adenocarcinoma subclasses. *Proc. Natl. Acad. Sci.* **2001**, *98*, 13790–13795, <https://doi.org/10.1073/pnas.191502998>.
2. Garber, M.E.; Troyanskaya, O.G.; Schluens, K.; Petersen, S.; Thaessler, Z.; Pacyna-Gengelbach, M.; van de Rijn, M.; Rosen, G.D.; Perou, C.; Whyte, R.I.; et al. Diversity of gene expression in adenocarcinoma of the lung. *Proc. Natl. Acad. Sci.* **2001**, *98*, 13784–13789, <https://doi.org/10.1073/pnas.241500798>.
3. Beer, D.G.; Kardia, S.L.; Huang, C.-C.; Giordano, T.; Levin, A.M.; Misek, D.E.; Lin, L.; Chen, G.; Gharib, T.G.; Thomas, D.G.; et al. Gene-expression profiles predict survival of patients with lung adenocarcinoma. *Nat. Med.* **2002**, *8*, 816–824, <https://doi.org/10.1038/nm733> [pii].
4. Tomida, S.; Koshikawa, K.; Yatabe, Y.; Harano, T.; Ogura, N.; Mitsudomi, T.; Some, M.; Yanagisawa, K.; Takahashi, T.; Osada, H.; et al. Gene expression-based, individualized outcome prediction for surgically treated lung cancer patients. *Oncogene* **2004**, *23*, 5360–5370, <https://doi.org/10.1038/sj.onc.1207697>.
5. Hayes, D.N.; Monti, S.; Parmigiani, G.; Gilks, C.B.; Naoki, K.; Bhattacharjee, A.; Socinski, M.A.; Perou, C.; Meyerson, M. Gene Expression Profiling Reveals Reproducible Human Lung Adenocarcinoma Subtypes in Multiple Independent Patient Cohorts. *J. Clin. Oncol.* **2006**, *24*, 5079–5090, <https://doi.org/10.1200/jco.2005.05.1748>.
6. Takeuchi, T.; Tomida, S.; Yatabe, Y.; Kosaka, T.; Osada, H.; Yanagisawa, K.; Mitsudomi, T.; Takahashi, T. Expression Profile-Defined Classification of Lung Adenocarcinoma Shows Close Relationship With Underlying Major Genetic Changes and Clinicopathologic Behaviors. *J. Clin. Oncol.* **2006**, *24*, 1679–1688, <https://doi.org/10.1200/jco.2005.03.8224>.
7. Shibata, T.; Hanada, S.; Kokubu, A.; Matsuno, Y.; Asamura, H.; Ohta, T.; Sakamoto, M.; Hirohashi, S. Gene expression profiling of epidermal growth factor receptor/KRAS pathway activation in lung adenocarcinoma. *Cancer Sci.* **2007**, *98*, 985–991, <https://doi.org/10.1111/j.1349-7006.2007.00483.x>.
8. Park, Y.-Y.; Park, E.S.; Kim, S.B.; Kim, S.C.; Sohn, B.H.; Chu, I.-S.; Jeong, W.; Mills, G.B.; Byers, L.A.; Lee, J.-S. Development and Validation of a Prognostic Gene-Expression Signature for Lung Adenocarcinoma. *PLOS ONE* **2012**, *7*, e44225, <https://doi.org/10.1371/journal.pone.0044225>.
9. Staaf, J.; Jönsson, G.; Jönsson, M.; Karlsson, A.; Isaksson, S.; Salomonsson, A.; Pettersson, H.M.; Soller, M.; Ewers, S.-B.; Johansson, L.; et al. Relation between smoking history and gene expression profiles in lung adenocarcinomas. *BMC Med Genom.* **2012**, *5*, 22–22, <https://doi.org/10.1186/1755-8794-5-22>.
10. Wilkerson, M.D.; Yin, X.; Walter, V.; Zhao, N.; Cabanski, C.R.; Hayward, M.C.; Miller, C.; Socinski, M.A.; Parsons, A.M.; Thorne, L.B.; et al. Differential Pathogenesis of Lung Adenocarcinoma Subtypes Involving Sequence Mutations, Copy Number, Chromosomal Instability, and Methylation. *PLOS ONE* **2012**, *7*, e36530, <https://doi.org/10.1371/journal.pone.0036530>.
11. Cheung, W.K.; Zhao, M.; Liu, Z.; Stevens, L.E.; Cao, P.D.; Fang, J.E.; Westbrook, T.F.; Nguyen, D.X. Control of Alveolar Differentiation by the Lineage Transcription Factors GATA6 and HOPX Inhibits Lung Adenocarcinoma Metastasis. *Cancer Cell* **2013**, *23*, 725–738, <https://doi.org/10.1016/j.ccr.2013.04.009>.
12. Fukui, T.; Shaykhiyev, R.; Agosto-Perez, F.; Mezey, J.G.; Downey, R.J.; Travis, W.D.; Crystal, R.G. Lung adenocarcinoma subtypes based on expression of human airway basal cell genes. *Eur. Respir. J.* **2013**, *42*, 1332–1344, <https://doi.org/10.1183/09031936.00144012>.
13. The Cancer Genome Atlas Research Network Comprehensive molecular profiling of lung adenocarcinoma. *Nat. Cell Biol.* **2014**, *511*, 543–550, <https://doi.org/10.1038/nature13385>.
14. Ringner, M.; Staaf, J. Consensus of gene expression phenotypes and prognostic risk predictors in primary lung adenocarcinoma. *Oncotarget* **2016**, *7*, 52957–52973, <https://doi.org/10.18632/oncotarget.10641>.
15. Chen, F.; Zhang, Y.; Parra, E.; Rodriguez, J.; Behrens, C.; Akbani, R.; Lu, Y.; Kurie, J.M.; Gibbons, D.L.; Mills, G.; et al. Multi-platform-based molecular subtypes of non-small-cell lung cancer. *Oncogene* **2016**, *36*, 1384–1393, <https://doi.org/10.1038/onc.2016.303>.
16. Hu, F.; Zhou, Y.; Wang, Q.; Yang, Z.; Shi, Y.; Chi, Q. Gene expression classification of lung adenocarcinoma into molecular subtypes. *IEEE/ACM Trans. Comput. Biol. Bioinform.* **2019**, 1–1, <https://doi.org/10.1109/tcbb.2019.2905553>.
17. Inamura, K.; Fujiwara, T.; Hoshida, Y.; Isagawa, T.; Jones, M.; Virtanen, C.; Shimane, M.; Satoh, Y.; Okumura, S.; Nakagawa, K.; et al. Two subclasses of lung squamous cell carcinoma with different gene expression profiles and prognosis identified by hierarchical clustering and non-negative matrix factorization. *Oncogene* **2005**, *24*, 7105–7113, <https://doi.org/10.1038/sj.onc.1208858>.
18. Raponi, M.; Zhang, Y.; Yu, J.; Chen, G.; Lee, G.; Taylor, J.M.; Macdonald, J.; Thomas, D.; Moskaluk, C.; Wang, Y.; et al. Gene Expression Signatures for Predicting Prognosis of Squamous Cell and Adenocarcinomas of the Lung. *Cancer Res.* **2006**, *66*, 7466–7472, <https://doi.org/10.1158/0008-5472.can-06-1191>.
19. Larsen, J.E.; Pavay, S.J.; Passmore, L.H.; Bowman, R.; Clarke, B.E.; Hayward, N.K.; Fong, K.M. Expression profiling defines a recurrence signature in lung squamous cell carcinoma. *Carcinogenesis* **2006**, *28*, 760–766, <https://doi.org/10.1093/carcin/bgl207>.
20. Wilkerson, M.D.; Yin, X.; Hoadley, K.; Liu, Y.; Hayward, M.C.; Cabanski, C.R.; Muldrew, K.; Miller, C.; Randell, S.H.; Socinski, M.A.; et al. Lung Squamous Cell Carcinoma mRNA Expression Subtypes Are Reproducible, Clinically Important, and Correspond to Normal Cell Types. *Clin. Cancer Res.* **2010**, *16*, 4864–4875, <https://doi.org/10.1158/1078-0432.ccr-10-0199>.
21. The Cancer Genome Atlas Research Network Comprehensive genomic characterization of squamous cell lung cancers. *Nature* **2012**, *489*, 519–525, <https://doi.org/10.1038/nature11404>.

22. Brambilla, C.; Laffaire, J.; Lantuejoul, S.; Moro-Sibilot, D.; Mignotte, H.; Arbib, F.; Toffart, A.-C.; Petel, F.; Hainaut, P.; Rousseaueux, S.; et al. Lung Squamous Cell Carcinomas with Basaloid Histology Represent a Specific Molecular Entity. *Clin. Cancer Res.* **2014**, *20*, 5777–5786, <https://doi.org/10.1158/1078-0432.ccr-14-0459>.
23. Chen, E.-G.; Wang, P.; Lou, H.; Wang, Y.; Yan, H.; Bi, L.; Liu, L.; Li, B.; Snijders, A.M.; Mao, J.-H.; et al. A robust gene expression-based prognostic risk score predicts overall survival of lung adenocarcinoma patients. *Oncotarget* **2017**, *9*, 6862–6871, <https://doi.org/10.18632/oncotarget.23490>.
24. Shahid, M.; Choi, T.G.; Nguyen, M.N.; Matondo, A.; Jo, Y.H.; Yoo, J.Y.; Nguyen, N.N.Y.; Yun, H.R.; Kim, J.; Akter, S.; et al. An 8-gene signature for prediction of prognosis and chemoresponse in non-small cell lung cancer. *Oncotarget* **2016**, *7*, 86561–86572, <https://doi.org/10.18632/oncotarget.13357>.
25. Xu, W.; Jia, G.; Davie, J.; Murphy, L.; Kratzke, R.; Banerji, S. A 10-Gene Yin Yang Expression Ratio Signature for Stage IA and IB Non-Small Cell Lung Cancer. *J. Thorac. Oncol.* **2016**, *11*, 2150–2160, <https://doi.org/10.1016/j.jtho.2016.07.023>.
26. Krzystanek, M.; Moldvay, J.; Szüts, D.; Szallasi, Z.; Eklund, A.C. A robust prognostic gene expression signature for early stage lung adenocarcinoma. *Biomark. Res.* **2016**, *4*, 1–7, <https://doi.org/10.1186/s40364-016-0058-3>.
27. Zhang, W.; Mao, J.-H.; Zhu, W.; Jain, A.K.; Liu, K.; Brown, J.B.; Karpen, G.H. Centromere and kinetochore gene misexpression predicts cancer patient survival and response to radiotherapy and chemotherapy. *Nat. Commun.* **2016**, *7*, 12619–12619, <https://doi.org/10.1038/ncomms12619>.
28. Shukla, S.; Evans, J.R.; Malik, R.; Feng, F.Y.; Dhanasekaran, S.M.; Cao, X.; Chen, G.; Etherton-Beer, C.; Jiang, H.; Chinnaiyan, A.M. Development of a RNA-Seq Based Prognostic Signature in Lung Adenocarcinoma. *J. Natl. Cancer Inst.* **2016**, *109*, <https://doi.org/10.1093/jnci/djw200>.
29. Li, B.; Cui, Y.; Diehn, M.; Li, R. Development and Validation of an Individualized Immune Prognostic Signature in Early-Stage Nonsquamous Non-Small Cell Lung Cancer. *JAMA Oncol.* **2017**, *3*, 1529–1537, <https://doi.org/10.1001/jamaoncol.2017.1609>.
30. Namani, A.; Cui, Q.Q.; Wu, Y.; Wang, H.; Wang, X.J.; Tang, X. NRF2-regulated metabolic gene signature as a prognostic biomarker in non-small cell lung cancer. *Oncotarget* **2017**, *8*, 69847–69862, <https://doi.org/10.18632/oncotarget.19349>.
31. Chen, E.-G.; Wang, P.; Lou, H.; Wang, Y.; Yan, H.; Bi, L.; Liu, L.; Li, B.; Snijders, A.M.; Mao, J.-H.; et al. A robust gene expression-based prognostic risk score predicts overall survival of lung adenocarcinoma patients. *Oncotarget* **2017**, *9*, 6862–6871, <https://doi.org/10.18632/oncotarget.23490>.
32. Li, J.; Wang, J.; Chen, Y.; Yang, L.; Chen, S. A prognostic 4-gene expression signature for squamous cell lung carcinoma. *J. Cell. Physiol.* **2017**, *232*, 3702–3713, <https://doi.org/10.1002/jcp.25846>.
33. Higgs, B.W.; Morehouse, C.A.; Streicher, K.L.; Brohawn, P.Z.; Pilataxi, F.; Gupta, A.; Ranade, K. Interferon Gamma Messenger RNA Signature in Tumor Biopsies Predicts Outcomes in Patients with Non-Small Cell Lung Carcinoma or Urothelial Cancer Treated with Durvalumab. *Clin. Cancer Res.* **2018**, *24*, 3857–3866, <https://doi.org/10.1158/1078-0432.ccr-17-3451>.
34. Zheng, S.; Luo, X.; Dong, C.; Zheng, D.; Xie, J.; Zhuge, L.; Sun, Y.; Chen, H. A B7-CD28 family based signature demonstrates significantly different prognoses and tumor immune landscapes in lung adenocarcinoma. *Int. J. Cancer* **2018**, *143*, 2592–2601, <https://doi.org/10.1002/ijc.31764>.
35. Zhang, M.-Y.; Liu, X.-X.; Li, H.; Li, R.; Qu, Y.-Q. Elevated mRNA Levels of AURKA, CDC20 and TPX2 are associated with poor prognosis of smoking related lung adenocarcinoma using bioinformatics analysis. *Int. J. Med. Sci.* **2018**, *15*, 1676–1685, <https://doi.org/10.7150/ijms.28728>.
36. Li, P.; Zhang, L.; Yu, X.; Tong, R.; Di, X.; Mao, Y.; Gao, Y.; Zhang, K.; Feng, L.; Cheng, S. Proliferation genes in lung development associated with the prognosis of lung adenocarcinoma but not squamous cell carcinoma. *Cancer Sci.* **2017**, *109*, 308–316, <https://doi.org/10.1111/cas.13456>.
37. Zuo, S.; Wei, M.; Zhang, H.; Chen, A.; Wu, J.; Wei, J.; Dong, J. A robust six-gene prognostic signature for prediction of both disease-free and overall survival in non-small cell lung cancer. *J. Transl. Med.* **2019**, *17*, 152, <https://doi.org/10.1186/s12967-019-1899-y>.
38. Xie, H.; Xie, C. A Six-Gene Signature Predicts Survival of Adenocarcinoma Type of Non-Small-Cell Lung Cancer Patients: A Comprehensive Study Based on Integrated Analysis and Weighted Gene Coexpression Network. *BioMed Res. Int.* **2019**, *2019*, 1–16, <https://doi.org/10.1155/2019/4250613>.
39. Wu, C.; Hwang, M. Risk stratification for lung adenocarcinoma on EGFR and TP53 mutation status, chemotherapy, and PD-L1 immunotherapy. *Cancer Med.* **2019**, *8*, 5850–5861, <https://doi.org/10.1002/cam4.2492>.
40. Jan, Y.-H.; Lai, T.-C.; Yang, C.-J.; Huang, M.-S.; Hsiao, M. A co-expressed gene status of adenylate kinase 1/4 reveals prognostic gene signature associated with prognosis and sensitivity to EGFR targeted therapy in lung adenocarcinoma. *Sci. Rep.* **2019**, *9*, 1–11, <https://doi.org/10.1038/s41598-019-48243-9>.
41. Wang, Z.; Wang, Z.; Niu, X.; Liu, J.; Wang, Z.; Chen, L.; Qin, B. Identification of seven-gene signature for prediction of lung squamous cell carcinoma. *OncoTargets Ther.* **2019**, *ume 12*, 5979–5988, <https://doi.org/10.2147/ott.s198998>.
42. Zhang, J.; Bing, Z.; Yan, P.; Tian, J.; Shi, X.; Wang, Y.; Yang, K. Identification of 17 mRNAs and a miRNA as an integrated prognostic signature for lung squamous cell carcinoma. *J. Gene Med.* **2019**, *21*, e3105, <https://doi.org/10.1002/jgm.3105>.
43. Liu, C.; Li, Y.; Wei, M.; Zhao, L.; Yu, Y.; Li, G. Identification of a novel glycolysis-related gene signature that can predict the survival of patients with lung adenocarcinoma. *Cell Cycle* **2019**, *18*, 568–579, <https://doi.org/10.1080/15384101.2019.1578146>.
44. Li, J.; Wang, H.; Li, Z.; Zhang, C.; Zhang, C.; Li, C.; Yu, H.; Wang, H. A 5-Gene Signature Is Closely Related to Tumor Immune Microenvironment and Predicts the Prognosis of Patients with Non-Small Cell Lung Cancer. *BioMed Res. Int.* **2020**, *2020*, 1–9, <https://doi.org/10.1155/2020/2147397>.

45. Liu, Y.; Guo, X.; Zhao, M.; Ao, H.; Leng, X.; Liu, M.; Wu, C.; Ma, J.; Zhu, J. Contributions and prognostic values of m 6 A RNA methylation regulators in non-small-cell lung cancer. *J. Cell. Physiol.* **2020**, *235*, 6043–6057, <https://doi.org/10.1002/jcp.29531>.
46. Liu, G.; Xie, W.; Jin, M.; Li, P.; Liu, L.; Liu, L.; Huang, G. Transcriptomic analysis reveals a WNT signaling pathway-based gene signature prognostic for non-small cell carcinoma. *Aging* **2020**, *12*, 19159–19172, <https://doi.org/10.18632/aging.103724>.
47. Li, Z.; Qi, F.; Li, F. Establishment of a Gene Signature to Predict Prognosis for Patients with Lung Adenocarcinoma. *Int. J. Mol. Sci.* **2020**, *21*, 8479, <https://doi.org/10.3390/ijms21228479>.
48. Liu, Y.; Wu, L.; Ao, H.; Zhao, M.; Leng, X.; Liu, M.; Ma, J.; Zhu, J. Prognostic implications of autophagy-associated gene signatures in non-small cell lung cancer. *Aging* **2019**, *11*, 11440–11462, <https://doi.org/10.18632/aging.102544>.
49. Li, J.; Li, Q.; Su, Z.; Sun, Q.; Zhao, Y.; Feng, T.; Jiang, J.; Zhang, F.; Ma, H. Lipid metabolism gene-wide profile and survival signature of lung adenocarcinoma. *Lipids Heal. Dis.* **2020**, *19*, 1–9, <https://doi.org/10.1186/s12944-020-01390-9>.
50. Li, J.; Li, X.; Zhang, C.; Zhang, C.; Wang, H. A signature of tumor immune microenvironment genes associated with the prognosis of non-small cell lung cancer. *Oncol. Rep.* **2020**, *43*, 795–806, <https://doi.org/10.3892/or.2020.7464>.
51. Fan, T.; Zhu, M.; Wang, L.; Liu, Y.; Tian, H.; Zheng, Y.; Tan, F.; Sun, N.; Li, C.; He, J. Immune profile of the tumor microenvironment and the identification of a four-gene signature for lung adenocarcinoma. *Aging* **2020**, *13*, 2397–2417, <https://doi.org/10.18632/aging.202269>.
52. Ma, C.; Luo, H.; Cao, J.; Zheng, X.; Zhang, J.; Zhang, Y.; Fu, Z. Identification of a Novel Tumor Microenvironment-Associated Eight-Gene Signature for Prognosis Prediction in Lung Adenocarcinoma. *Front. Mol. Biosci.* **2020**, *7*, <https://doi.org/10.3389/fmolb.2020.571641>.
53. Han, L.; Shi, H.; Luo, Y.; Sun, W.; Li, S.; Zhang, N.; Jiang, X.; Gong, Y.; Xie, C. Gene signature based on B cell predicts clinical outcome of radiotherapy and immunotherapy for patients with lung adenocarcinoma. *Cancer Med.* **2020**, *9*, 9581–9594, <https://doi.org/10.1002/cam4.3561>.
54. Ma, H.; Tong, L.; Zhang, Q.; Chang, W.; Li, F. Identification of 5 Gene Signatures in Survival Prediction for Patients with Lung Squamous Cell Carcinoma Based on Integrated Multiomics Data Analysis. *BioMed Res. Int.* **2020**, *2020*, 1–19, <https://doi.org/10.1155/2020/6427483>.
55. Bao, X.; Shi, R.; Zhao, T.; Wang, Y. Immune landscape and a novel immunotherapy-related gene signature associated with clinical outcome in early-stage lung adenocarcinoma. *J. Mol. Med.* **2020**, *98*, 805–818, <https://doi.org/10.1007/s00109-020-01908-9>.
56. Yu, X.; Zhang, X.; Zhang, Y. Identification of a 5-Gene Metabolic Signature for Predicting Prognosis Based on an Integrated Analysis of Tumor Microenvironment in Lung Adenocarcinoma. *J. Oncol.* **2020**, *2020*, 1–12, <https://doi.org/10.1155/2020/5310793>.
57. Tang, Y.; Jiang, Y.; Qing, C.; Wang, J.; Zeng, Z. Systematic construction and validation of an epithelialmesenchymal transition risk model to predict prognosis of lung adenocarcinoma. *Aging* **2020**, *13*, 794–812, <https://doi.org/10.18632/aging.202186>.
58. Jiang, H.; Xu, S.; Chen, C. A ten-gene signature-based risk assessment model predicts the prognosis of lung adenocarcinoma. *BMC Cancer* **2020**, *20*, 1–11, <https://doi.org/10.1186/s12885-020-07235-z>.
59. He, L.; Chen, J.; Xu, F.; Li, J. Prognostic Implication of a Metabolism-Associated Gene Signature in Lung Adenocarcinoma. *Mol. Ther. - Oncolytics* **2020**, *19*, 265–277, <https://doi.org/10.1016/j.omto.2020.09.011>.
60. Song, C.; Guo, Z.; Yu, D.; Wang, Y.; Wang, Q.; Dong, Z.; Hu, W. A Prognostic Nomogram Combining Immune-Related Gene Signature and Clinical Factors Predicts Survival in Patients With Lung Adenocarcinoma. *Front. Oncol.* **2020**, *10*, 1300, <https://doi.org/10.3389/fonc.2020.01300>.
61. Ma, X.; Ren, H.; Peng, R.; Li, Y.; Ming, L. Identification of key genes associated with progression and prognosis for lung squamous cell carcinoma. *PeerJ* **2020**, *8*, e9086, <https://doi.org/10.7717/peerj.9086>.
62. Zhao, Z.; He, B.; Cai, Q.; Zhang, P.; Peng, X.; Zhang, Y.; Xie, H.; Wang, X. A model of twenty-three metabolic-related genes predicting overall survival for lung adenocarcinoma. *PeerJ* **2020**, *8*, e10008, <https://doi.org/10.7717/peerj.10008>.
63. Sun, J.; Zhao, T.; Zhao, D.; Qi, X.; Bao, X.; Shi, R.; Su, C. Development and validation of a hypoxia-related gene signature to predict overall survival in early-stage lung adenocarcinoma patients. *Ther. Adv. Med. Oncol.* **2020**, *12*, <https://doi.org/10.1177/1758835920937904>.
64. Wu, X.; Wang, L.; Feng, F.; Tian, S. Weighted gene expression profiles identify diagnostic and prognostic genes for lung adenocarcinoma and squamous cell carcinoma. *J. Int. Med Res.* **2019**, *48*, <https://doi.org/10.1177/0300060519893837>.
65. Li, W.; Li, X.; Gao, L.-N.; You, C.-G. Integrated Analysis of the Functions and Prognostic Values of RNA Binding Proteins in Lung Squamous Cell Carcinoma. *Front. Genet.* **2020**, *11*, <https://doi.org/10.3389/fgene.2020.00185>.
66. Guo, D.; Wang, M.; Shen, Z.; Zhu, J. A new immune signature for survival prediction and immune checkpoint molecules in lung adenocarcinoma. *J. Transl. Med.* **2020**, *18*, 1–14, <https://doi.org/10.1186/s12967-020-02286-z>.
67. Zhang, Y.; Zhang, X.; Lv, X.; Zhang, M.; Gao, X.; Liu, J.; Xu, Y.; Fang, Z.; Chen, W. Development and Validation of a Seven-Gene Signature for Predicting the Prognosis of Lung Adenocarcinoma. *BioMed Res. Int.* **2020**, *2020*, 1–10, <https://doi.org/10.1155/2020/1836542>.
68. Nema, R.; Shrivastava, A.; Kumar, A. Prognostic role of lipid phosphate phosphatases in non-smoker, lung adenocarcinoma patients. *Comput. Biol. Med.* **2020**, *129*, 104141, <https://doi.org/10.1016/j.compbiomed.2020.104141>.
69. Yang, X.; Wang, G.; Gu, R.; Xu, X.; Zhu, G. A signature of tumor DNA repair genes associated with the prognosis of surgically-resected lung adenocarcinoma. *PeerJ* **2020**, *8*, e10418, <https://doi.org/10.7717/peerj.10418>.
70. Wu, P.; Zheng, Y.; Wang, Y.; Wang, Y.; Liang, N. Development and validation of a robust immune-related prognostic signature in early-stage lung adenocarcinoma. *J. Transl. Med.* **2020**, *18*, 1–12, <https://doi.org/10.1186/s12967-020-02545-z>.

71. Wu, Q.; Wang, L.; Wei, H.; Li, B.; Yang, J.; Wang, Z.; Xu, J.; Zhou, Y.L.; Zhang, B. Integration of multiple key molecules in lung adenocarcinoma identifies prognostic and immunotherapeutic relevant gene signatures. *Int. Immunopharmacol.* **2020**, *83*, 106477, <https://doi.org/10.1016/j.intimp.2020.106477>.
72. Zou, X.; Hu, Z.; Huang, C.; Chang, J. A Seven-Genes Signature with Close Immune Correlation Was Identified for Survival Prediction of Lung Adenocarcinoma. *Med Sci. Monit.* **2020**, *26*, <https://doi.org/10.12659/msm.924269>.
73. Li, C.; Long, Q.; Zhang, D.; Li, J.; Zhang, X. Identification of a four-gene panel predicting overall survival for lung adenocarcinoma. *BMC Cancer* **2020**, *20*, 1–16, <https://doi.org/10.1186/s12885-020-07657-9>.
74. Zengin, T.; Önal-Süzek, T. Analysis of genomic and transcriptomic variations as prognostic signature for lung adenocarcinoma. *BMC Bioinform.* **2020**, *21*, 1–28, <https://doi.org/10.1186/s12859-020-03691-3>.
75. Zhao, M.; Li, M.; Chen, Z.; Bian, Y.; Zheng, Y.; Hu, Z.; Liang, J.; Huang, Y.; Yin, J.; Zhan, C.; et al. Identification of immune-related gene signature predicting survival in the tumor microenvironment of lung adenocarcinoma. *Immunogenetics* **2020**, *72*, 455–465, <https://doi.org/10.1007/s00251-020-01189-z>.
76. Cao, Y.; Lu, X.; Li, Y.; Fu, J.; Li, H.; Li, X.; Chang, Z.; Liu, S. Identification of a six-gene metabolic signature predicting overall survival for patients with lung adenocarcinoma. *PeerJ* **2020**, *8*, e10320, <https://doi.org/10.7717/peerj.10320>.
77. Zhao, J.; Guo, C.; Ma, Z.; Liu, H.; Yang, C.; Li, S. Identification of a novel gene expression signature associated with overall survival in patients with lung adenocarcinoma: A comprehensive analysis based on TCGA and GEO databases. *Lung Cancer* **2020**, *149*, 90–96, <https://doi.org/10.1016/j.lungcan.2020.09.014>.
78. Zheng, Z.; Deng, W.; Yang, J. Identification of 5-Genes Signature Improves Lung Adenocarcinoma Prognostic Stratification Based on Differential Expression Invasion Genes of Molecular Subtypes. *BioMed Res. Int.* **2020**, *2020*, 1–22, <https://doi.org/10.1155/2020/8832739>.
79. Ma, N.; Si, L.; Yang, M.; Li, M.; He, Z. A highly expressed mRNA signature for predicting survival in patients with stage I/II non-small-cell lung cancer after operation. *Sci. Rep.* **2021**, *11*, 1–18, <https://doi.org/10.1038/s41598-021-85246-x>.
80. Yan, D.; Chen, Y. Tumor mutation burden (TMB)-associated signature constructed to predict survival of lung squamous cell carcinoma patients. *Sci. Rep.* **2021**, *11*, 1–11, <https://doi.org/10.1038/s41598-021-88694-7>.
81. Ma, W.; Liang, J.; Liu, J.; Tian, D.; Chen, Z. Establishment and validation of an eight-gene metabolic-related prognostic signature model for lung adenocarcinoma. *Aging* **2021**, *13*, 8688–8705, <https://doi.org/10.18632/aging.202681>.
82. Zhang, X.; Shi, X.; Zhao, H.; Jia, X.; Yang, Y. Identification and Validation of a Tumor Microenvironment-Related Gene Signature for Prognostic Prediction in Advanced-Stage Non-Small-Cell Lung Cancer. *BioMed Res. Int.* **2021**, *2021*, 1–18, <https://doi.org/10.1155/2021/8864436>.
83. Yao, J.; Li, R.; Liu, X.; Zhou, X.; Li, J.; Liu, T.; Huo, C.; Qu, Y. Prognostic implication of glycolysis related gene signature in non-small cell lung cancer. *J. Cancer* **2021**, *12*, 885–898, <https://doi.org/10.7150/jca.50274>.
84. Yang, T.; Hao, L.; Cui, R.; Liu, H.; Chen, J.; An, J.; Qi, S.; Li, Z. Identification of an immune prognostic 11-gene signature for lung adenocarcinoma. *PeerJ* **2021**, *9*, e10749, <https://doi.org/10.7717/peerj.10749>.
85. Ma, Q.; Chen, Y.; Xiao, F.; Hao, Y.; Song, Z.; Zhang, J.; Okuda, K.; Um, S.-W.; Silva, M.; Shimada, Y.; et al. A signature of estimate-stromal-immune score-based genes associated with the prognosis of lung adenocarcinoma. *Transl. Lung Cancer Res.* **2021**, *10*, 1484–1500, <https://doi.org/10.21037/tlcr-21-223>.
86. Wang, S.; Wu, C.; Ma, D.; Hu, Q. Identification of a ferroptosis-related gene signature (FRGS) for predicting clinical outcome in lung adenocarcinoma. *PeerJ* **2021**, *9*, e11233, <https://doi.org/10.7717/peerj.11233>.
87. Xu, Z.; Zhang, S.; Nian, F.; Xu, S. Identification of a glycolysis-related gene signature associated with clinical outcome for patients with lung squamous cell carcinoma. *Cancer Med.* **2021**, *10*, 4017–4029, <https://doi.org/10.1002/cam4.3945>.
88. Tu, Z.; He, X.; Zeng, L.; Meng, D.; Zhuang, R.; Zhao, J.; Dai, W. Exploration of Prognostic Biomarkers for Lung Adenocarcinoma Through Bioinformatics Analysis. *Front. Genet.* **2021**, *12*, <https://doi.org/10.3389/fgene.2021.647521>.
89. Zhu, G.; Huang, H.; Xu, S.; Shi, R.; Gao, Z.; Lei, X.; Zhu, S.; Zhou, N.; Zu, L.; De Mello, R.A.; et al. Prognostic value of ferroptosis-related genes in patients with lung adenocarcinoma. *Thorac. Cancer* **2021**, *12*, 1890–1899, <https://doi.org/10.1111/1759-7714.13998>.
90. Xu, R.; Lu, T.; Wang, J.; Zhang, L. A novel protein ubiquitination-related five-gene signature predicts overall survival in patients with lung adenocarcinoma. *Aging* **2021**, *13*, 8510–8523, <https://doi.org/10.18632/aging.202663>.
91. Chen, J.; Zhou, R. Tumor microenvironment related novel signature predict lung adenocarcinoma survival. *PeerJ* **2021**, *9*, e10628, <https://doi.org/10.7717/peerj.10628>.
92. Yang, L.; written on behalf of the AME Thoracic Surgery Collaborative Group; Zhang, R.; Guo, G.; Wang, G.; Wen, Y.; Lin, Y.; Zhang, X.; Yu, X.; Huang, Z.; et al. Development and validation of a prediction model for lung adenocarcinoma based on RNA-binding protein. *Ann. Transl. Med.* **2021**, *9*, 474–474, <https://doi.org/10.21037/atm-21-452>.
93. Miao, T.-W.; Du, L.-Y.; Xiao, W.; Mao, B.; Wang, Y.; Fu, J.-J. Identification of Survival-Associated Gene Signature in Lung Cancer Coexisting With COPD. *Front. Oncol.* **2021**, *11*, <https://doi.org/10.3389/fonc.2021.600243>.
94. Wang, Z.; Embaye, K.S.; Yang, Q.; Qin, L.; Zhang, C.; Liu, L.; Zhan, X.; Zhang, F.; Wang, X.; Qin, S. Establishment and validation of a prognostic signature for lung adenocarcinoma based on metabolism-related genes. *Cancer Cell Int.* **2021**, *21*, 1–16, <https://doi.org/10.1186/s12935-021-01915-x>.
